# Supplementary material
Source: Springer Nature journal article supplement (https://www.springermedizin.de/resource/supplementary/12967_2014_1869_MOESM4_ESM.pdf/9574962)
Supplement: MOESM4 [file 9574962]

**Table 4. Functionalized carbon nanotubes and graphene on Dendritic cells (DCs)**

| Material                                                                            | Funzionalizations                                  | Species                                                                             | Model                                                | Other cell types             | Year | Reference                    |
|-------------------------------------------------------------------------------------|----------------------------------------------------|-------------------------------------------------------------------------------------|------------------------------------------------------|------------------------------|------|------------------------------|
|    | DNA and siRNA functionalized                       |    | <i>In vivo In vitro</i> (RAW 264.7, Bone marrow DCs) | Macrophages                  | 2006 | Yang R et al. (Gene Therapy) |
|    | Phospholipids [pro-apoptotic cargo (cytochrome c)] |    | <i>In vivo, ex vivo, in vitro</i> (RAW 264.7)        | Macrophages, Brain microglia | 2009 | Konduru NK et al. (Plos One) |
|    | Carboxylated                                       |    | <i>Ex vivo, in vivo</i>                              | L. T                         | 2011 | Tkach AV et al. (ACS Nano)   |
|  | Primary amines conjugate with WT1Pep427            |  | <i>Ex vivo</i>                                       | L. T                         | 2011 | Villa CH et al. (ACS Nano)   |
|  | Negatively-charged                                 |  | <i>Ex vivo, in vitro</i> [Hybridoma T cells (B3Z)]   | L. T                         | 2012 | Tkach AV et al. (Small)      |
|  | Coated with polyvinylpyrrolidone (PVP)             |  | <i>Ex vivo</i>                                       | L. T, Macrophages            | 2013 | Zhi X et al. (Biomaterials)  |
|  | Oxidized - benzoic acid functionalization and FITC |  | <i>In vivo, ex vivo</i>                              | Macrophages                  | 2013 | Yang M et al. (Small)        |

| Legend                                                                             |                                                             |
|------------------------------------------------------------------------------------|-------------------------------------------------------------|
|   | MWCNTs                                                      |
|   | DWCNTs                                                      |
|   | SWCNTs                                                      |
|   | Carbon Nanohorns                                            |
|   | Graphene                                                    |
|   | Graphene Oxide                                              |
|   | Mouse                                                       |
|  | Human                                                       |
| <i>Italics</i>                                                                     | <i>Articles that considered more than one type of cells</i> |
